# Supplementary material for: SnSe alloy as a promising anode material for Na-ion batteries
Source: Royal Society of Chemistry journal article supplement (doi:10.1039/c4cc06106c), 2014-10-24
Supplement: c4cc06106c1.pdf [file c4cc06106c1.pdf]

Electronic Supplementary Material (ESI) for ChemComm.  
This journal is © The Royal Society of Chemistry 2014

## Supporting Information

### **SnSe alloy as a promising anode material for Na-ion batteries**

Youngjin Kim,<sup>a</sup> Yongil Kim,<sup>a</sup> Yuwon Park,<sup>a</sup> Yong Nam Jo,<sup>b</sup> Young-Jun Kim,<sup>b</sup> Nam-Soon Choi,<sup>a</sup> and Kyu Tae Lee\*<sup>a</sup>

<sup>a</sup> School of Energy and Chemical Engineering, Ulsan National Institute of Science and Technology (UNIST), 100 Banyeon-ri, Eonyang-eup, Ulju-gun, Ulsan, 689-798 (South Korea) E-mail: ktlee@unist.ac.kr, Fax: +82-52-217-3009, Tel: +82-52-217-2930.

<sup>b</sup> Advanced Batteries Research Center, Korea Electronics Technology Institute (KETI), 68 Yatap-dong, Bundang-gu, Seongnam-si, Gyeonggi-do, 463-816 (South Korea)

#### **Experimental**

##### **1. Material preparation**

Tin selenide powder (Aldrich, 99.995 %), Super P and 5 mm zirconia balls with a ball-to-powder ratio of 10:1 by weight were put into zirconia bowl. The molar ratio of SnSe and Super P powders used 7:3, respectively. Blending process was performed by planetary ball milling (Pulverisette 7) at 300 rpm for 3 hours in Ar atmosphere.

##### **2. Material characterization**

Powder X-Ray diffraction (XRD) data were recorded using a Rigaku D/MAX2500V/PC

powder diffractometer (Cu-K $\alpha$  radiation,  $\lambda = 1.5405 \text{ \AA}$ ) operated from  $2\theta = 10\sim 80^\circ$  at 40 kV and 200 mA. The morphology of sample was examined in a field-emission scanning electron microscopy (FE-SEM, Hitachi, S-4800)

### **3. Electrochemical characterization**

Slurry of 70 wt. % SnSe/C composites, 10 wt. % conducting agent (Super P), and 20 wt. % polyacrylic acid (PAA) was cast on aluminum foil. The electrodes were dried at  $120^\circ\text{C}$  on a vacuum oven overnight. The mass loading of the electrodes is ca.  $1\sim 2 \text{ mg cm}^{-2}$ . The electrochemical characteristics were evaluated using 2032 coin cells with a Na metal anode and 1 M NaClO<sub>4</sub> (Aldrich,  $\geq 98 \%$ ) in ethylene carbonate and diethyl carbonate (1:1 v/v, PANAX ETEC Co., Ltd., Korea) electrolyte solution with addition of 3 wt. % fluoroethylene carbonate (FEC, Soulbrain Co. Ltd.). Galvanostatic experiments were carried out between 0.0 and 2 V (vs. Na / Na<sup>+</sup>) at a current density of  $144 \text{ mA g}^{-1}$  using WBCS 3000 (WonATech, Korea) under room temperature.

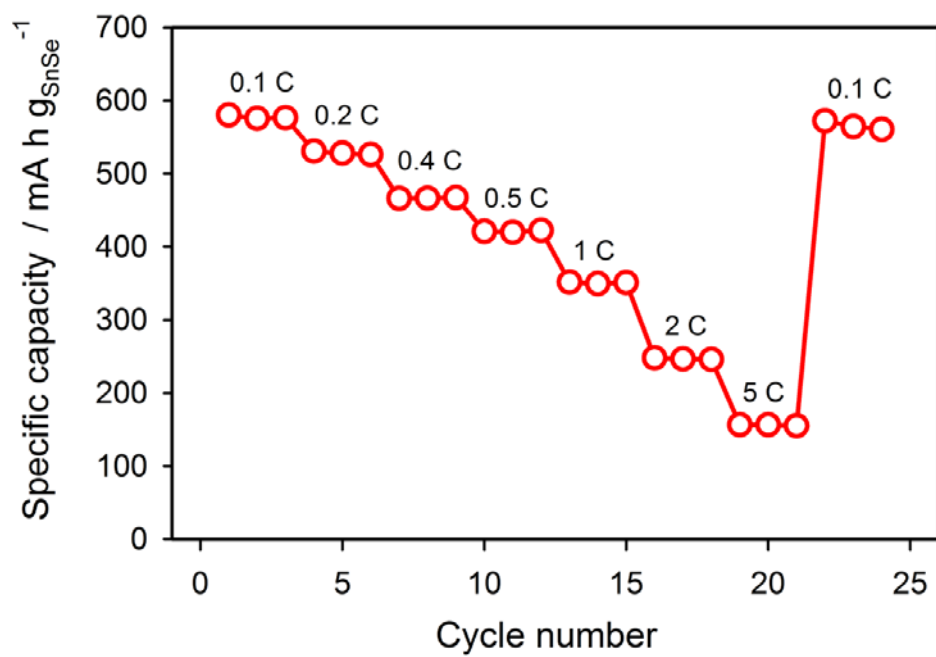

**Figure S1.** Rate performance of SnSe/C composites. (0.1 C = 77 mA g<sup>-1</sup>)
